# Supplementary material for: Effect of zinc : cobalt composition in ZnCo2O4 spinels for highly selective liquefied petroleum gas sensing at low and high temperatures
Source: Royal Society of Chemistry journal article supplement (doi:10.1039/c5ra03960f), 2015-01-01
Supplement: c5ra03960f1.pdf [file c5ra03960f1.pdf]

**Effect of composition zinc:cobalt in ZnCo<sub>2</sub>O<sub>4</sub> spinel on highly selective liquefied petroleum gas sensor at low and high temperature conditions**

**Electronic Supplementary Information  
(ESI)**

**Table S1.** BET surface area of prepared catalysts.

| Catalysts | Specific surface area (m <sup>2</sup> /g) |
|-----------|-------------------------------------------|
| ZC-1      | 75                                        |
| ZC-2      | 79                                        |
| ZC-3      | 85                                        |
| ZC-4      | 90                                        |
| ZC-5      | 92                                        |

**Table S2.** Effect of calcination temperature on catalytic activity.

| Catalysts | Calcination Temperature (°C) | LPG Sensing response (KΩ) |
|-----------|------------------------------|---------------------------|
| ZC-4-a    | 300                          | 42                        |
| ZC-4-b    | 400                          | 69                        |
| ZC-4-c    | 500                          | 77                        |
| ZC-4-d    | 600                          | 79                        |

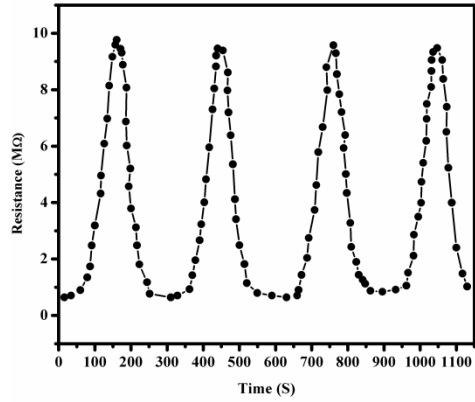

**Fig. S1.** Repetitive response of ZC-4 nano material to 40 ppm LPG at operating temperature of 30 °C.

**ESI: S-3**

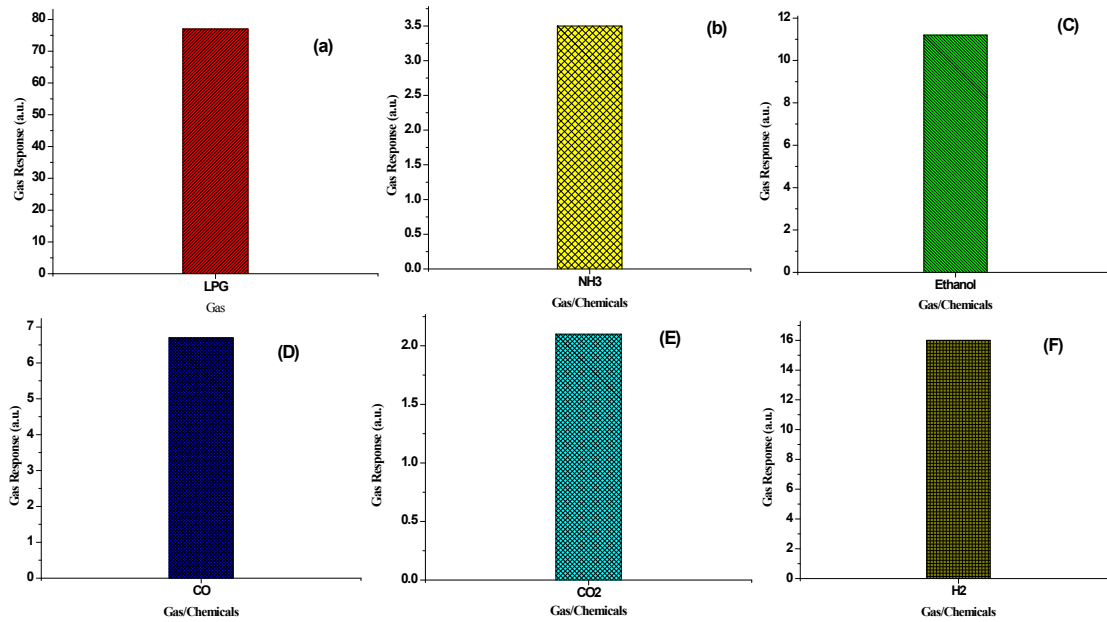

**Fig. S2.** Bar chart showing the gas response of ZC-4 nano material for different gases.
